# Supplementary material for: Fecal Microbiota and Gut Microbe-Derived Extracellular Vesicles in Colorectal Cancer
Source: Front Oncol. 2021 Sep 14;11:650026. doi: 10.3389/fonc.2021.650026 (PMC8477046; doi:10.3389/fonc.2021.650026)
Supplement: Supplementary file 2 [file Table_2.xlsx]

## Sheet: Sheet1
	Source	Site	BioProject Link	#patient	Accession number
1	Case (CRC)	fecal bacterial cells	https://www.ncbi.nlm.nih.gov/sra?linkname=bioproject_sra_all&from_uid=747730	70	SRR15182562	SRR15182563	SRR15182564	SRR15182565	SRR15182566	SRR15182567	SRR15182568	SRR15182569	SRR15182570	SRR15182571	SRR15182572	SRR15182573	SRR15182574	SRR15182575	SRR15182576	SRR15182577	SRR15182578	SRR15182579	SRR15182580	SRR15182581	SRR15182582	SRR15182583	SRR15182584	SRR15182585	SRR15182586	SRR15182587	SRR15182588	SRR15182589	SRR15182590	SRR15182591	SRR15182592	SRR15182593	SRR15182594	SRR15182595	SRR15182596	SRR15182597	SRR15182598	SRR15182599	SRR15182600	SRR15182601	SRR15182602	SRR15182603	SRR15182604	SRR15182605	SRR15182606
2	Case (CRC)	fecal bacterial extravesicles	https://www.ncbi.nlm.nih.gov/sra?linkname=bioproject_sra_all&from_uid=747732	70	SRR15182632	SRR15182633	SRR15182634	SRR15182635	SRR15182636	SRR15182637	SRR15182638	SRR15182639	SRR15182640	SRR15182641	SRR15182642	SRR15182643	SRR15182644	SRR15182645	SRR15182646	SRR15182647	SRR15182648	SRR15182649	SRR15182650	SRR15182651	SRR15182652	SRR15182653	SRR15182654	SRR15182655	SRR15182656	SRR15182657	SRR15182658	SRR15182659	SRR15182660	SRR15182661	SRR15182662	SRR15182663	SRR15182664	SRR15182665	SRR15182666	SRR15182667	SRR15182668	SRR15182669	SRR15182670	SRR15182671	SRR15182672	SRR15182673	SRR15182674	SRR15182675	SRR15182676
3	Control 1	fecal bacterial cells	https://www.ncbi.nlm.nih.gov/sra?linkname=bioproject_sra_all&from_uid=744330	63	SRR15056567	SRR15056569	SRR15056571	SRR15056572	SRR15056573	SRR15056574	SRR15056575	SRR15056577	SRR15056578	SRR15056579	SRR15056580	SRR15056581	SRR15056582	SRR15056583	SRR15056585	SRR15056586	SRR15056587	SRR15056590	SRR15056592	SRR15056593	SRR15056595	SRR15056597	SRR15056598	SRR15056600	SRR15056601	SRR15056602	SRR15056603	SRR15056604	SRR15056606	SRR15056607	SRR15056612	SRR15056622	SRR15056644	SRR15056656	SRR15056673	SRR15056674	SRR15056675	SRR15056676	SRR15056683	SRR15056684	SRR15056685	SRR15056687	SRR15056689	SRR15056691	SRR15056692
4	Control 1	fecal bacterial extravesicles	https://www.ncbi.nlm.nih.gov/sra?linkname=bioproject_sra_all&from_uid=744338	63	SRR15056787	SRR15056789	SRR15056791	SRR15056792	SRR15056793	SRR15056794	SRR15056795	SRR15056797	SRR15056798	SRR15056799	SRR15056800	SRR15056801	SRR15056802	SRR15056803	SRR15056805	SRR15056806	SRR15056807	SRR15056810	SRR15056812	SRR15056813	SRR15056815	SRR15056817	SRR15056818	SRR15056820	SRR15056821	SRR15056822	SRR15056823	SRR15056824	SRR15056826	SRR15056827	SRR15056832	SRR15056835	SRR15056836	SRR15056837	SRR15056839	SRR15056841	SRR15056843	SRR15056844	SRR15056845	SRR15056848	SRR15056849	SRR15056853	SRR15056854	SRR15056855	SRR15056858
5	Control 2	fecal bacterial cells	https://www.ncbi.nlm.nih.gov/sra?linkname=bioproject_sra_all&from_uid=675704	53	SRR15244175	SRR15244186	SRR15244197	SRR15244213	SRR15244214	SRR15244215	SRR15244217	SRR15244218	SRR15244219	SRR15244222	SRR15244223	SRR15244224	SRR15244227	SRR15244228	SRR15244232	SRR15244235	SRR15244236	SRR15244237	SRR15244238	SRR15244239	SRR15244240	SRR15244241	SRR15244242	SRR15244244	SRR15244245	SRR15244246	SRR15244247	SRR15244248	SRR15244249	SRR15244251	SRR15244252	SRR15244269	SRR15244291	SRR15244299	SRR15244301	SRR15244302	SRR15244303	SRR15244312	SRR15244313	SRR15244314	SRR15244315	SRR15244316	SRR15244319	SRR15244323	SRR15244324
6	Control 2	fecal bacterial extravesicles	https://www.ncbi.nlm.nih.gov/sra?linkname=bioproject_sra_all&from_uid=675704	53	SRR15245161	SRR15245172	SRR15245183	SRR15245199	SRR15245200	SRR15245201	SRR15245203	SRR15245204	SRR15245205	SRR15245208	SRR15245209	SRR15245210	SRR15245213	SRR15245214	SRR15245218	SRR15245221	SRR15245222	SRR15245223	SRR15245224	SRR15245225	SRR15245226	SRR15245227	SRR15245228	SRR15245230	SRR15245231	SRR15245232	SRR15245233	SRR15245234	SRR15245235	SRR15245237	SRR15245238	SRR15245248	SRR15245257	SRR15245279	SRR15245287	SRR15245289	SRR15245290	SRR15245291	SRR15245300	SRR15245301	SRR15245302	SRR15245303	SRR15245304	SRR15245307	SRR15245311
7	Control 3	fecal bacterial cells	https://www.ncbi.nlm.nih.gov/sra?linkname=bioproject_sra_all&from_uid=748447	42	SRR15204197	SRR15220896	SRR15220897	SRR15220902	SRR15220904	SRR15220908	SRR15220909	SRR15220912	SRR15220913	SRR15220914	SRR15220921	SRR15220926	SRR15220927	SRR15220929	SRR15220930	SRR15220931	SRR15220936	SRR15220937	SRR15220939	SRR15220941	SRR15220945	SRR15220946	SRR15220948	SRR15220951	SRR15220952	SRR15220965	SRR15220967	SRR15220968	SRR15220971	SRR15220972	SRR15220977	SRR15221018	SRR15221040	SRR15221051	SRR15221095	SRR15221104	SRR15221105	SRR15221107	SRR15221108	SRR15221110	SRR15221114	SRR15221118
8	Control 3	fecal bacterial extravesicles	https://www.ncbi.nlm.nih.gov/sra?linkname=bioproject_sra_all&from_uid=748447	42	SRR15243500	SRR15243522	SRR15243533	SRR15243568	SRR15243569	SRR15243574	SRR15243576	SRR15243580	SRR15243581	SRR15243591	SRR15243600	SRR15243601	SRR15243603	SRR15243604	SRR15243606	SRR15243610	SRR15243616	SRR15243617	SRR15243618	SRR15243625	SRR15243630	SRR15243631	SRR15243632	SRR15243633	SRR15243635	SRR15243636	SRR15243637	SRR15243642	SRR15243643	SRR15243645	SRR15243647	SRR15243651	SRR15243652	SRR15243654	SRR15243657	SRR15243658	SRR15243671	SRR15243673	SRR15243674	SRR15243677	SRR15243678	SRR15243683
[truncated: 25 more columns]

## Sheet: Sheet4
1	2	3	4	5	6	7	8
SRR15182562	SRR15182632	SRR15056567	SRR15056787	SRR15244175	SRR15245161	SRR15204197	SRR15243500
SRR15182563	SRR15182633	SRR15056569	SRR15056789	SRR15244186	SRR15245172	SRR15220896	SRR15243522
SRR15182564	SRR15182634	SRR15056571	SRR15056791	SRR15244197	SRR15245183	SRR15220897	SRR15243533
SRR15182565	SRR15182635	SRR15056572	SRR15056792	SRR15244213	SRR15245199	SRR15220902	SRR15243568
SRR15182566	SRR15182636	SRR15056573	SRR15056793	SRR15244214	SRR15245200	SRR15220904	SRR15243569
SRR15182567	SRR15182637	SRR15056574	SRR15056794	SRR15244215	SRR15245201	SRR15220908	SRR15243574
SRR15182568	SRR15182638	SRR15056575	SRR15056795	SRR15244217	SRR15245203	SRR15220909	SRR15243576
SRR15182569	SRR15182639	SRR15056577	SRR15056797	SRR15244218	SRR15245204	SRR15220912	SRR15243580
SRR15182570	SRR15182640	SRR15056578	SRR15056798	SRR15244219	SRR15245205	SRR15220913	SRR15243581
SRR15182571	SRR15182641	SRR15056579	SRR15056799	SRR15244222	SRR15245208	SRR15220914	SRR15243591
SRR15182572	SRR15182642	SRR15056580	SRR15056800	SRR15244223	SRR15245209	SRR15220921	SRR15243600
SRR15182573	SRR15182643	SRR15056581	SRR15056801	SRR15244224	SRR15245210	SRR15220926	SRR15243601
SRR15182574	SRR15182644	SRR15056582	SRR15056802	SRR15244227	SRR15245213	SRR15220927	SRR15243603
SRR15182575	SRR15182645	SRR15056583	SRR15056803	SRR15244228	SRR15245214	SRR15220929	SRR15243604
SRR15182576	SRR15182646	SRR15056585	SRR15056805	SRR15244232	SRR15245218	SRR15220930	SRR15243606
SRR15182577	SRR15182647	SRR15056586	SRR15056806	SRR15244235	SRR15245221	SRR15220931	SRR15243610
SRR15182578	SRR15182648	SRR15056587	SRR15056807	SRR15244236	SRR15245222	SRR15220936	SRR15243616
SRR15182579	SRR15182649	SRR15056590	SRR15056810	SRR15244237	SRR15245223	SRR15220937	SRR15243617
SRR15182580	SRR15182650	SRR15056592	SRR15056812	SRR15244238	SRR15245224	SRR15220939	SRR15243618
SRR15182581	SRR15182651	SRR15056593	SRR15056813	SRR15244239	SRR15245225	SRR15220941	SRR15243625
SRR15182582	SRR15182652	SRR15056595	SRR15056815	SRR15244240	SRR15245226	SRR15220945	SRR15243630
SRR15182583	SRR15182653	SRR15056597	SRR15056817	SRR15244241	SRR15245227	SRR15220946	SRR15243631
SRR15182584	SRR15182654	SRR15056598	SRR15056818	SRR15244242	SRR15245228	SRR15220948	SRR15243632
SRR15182585	SRR15182655	SRR15056600	SRR15056820	SRR15244244	SRR15245230	SRR15220951	SRR15243633
SRR15182586	SRR15182656	SRR15056601	SRR15056821	SRR15244245	SRR15245231	SRR15220952	SRR15243635
SRR15182587	SRR15182657	SRR15056602	SRR15056822	SRR15244246	SRR15245232	SRR15220965	SRR15243636
SRR15182588	SRR15182658	SRR15056603	SRR15056823	SRR15244247	SRR15245233	SRR15220967	SRR15243637
SRR15182589	SRR15182659	SRR15056604	SRR15056824	SRR15244248	SRR15245234	SRR15220968	SRR15243642
SRR15182590	SRR15182660	SRR15056606	SRR15056826	SRR15244249	SRR15245235	SRR15220971	SRR15243643
SRR15182591	SRR15182661	SRR15056607	SRR15056827	SRR15244251	SRR15245237	SRR15220972	SRR15243645
SRR15182592	SRR15182662	SRR15056612	SRR15056832	SRR15244252	SRR15245238	SRR15220977	SRR15243647
SRR15182593	SRR15182663	SRR15056622	SRR15056835	SRR15244269	SRR15245248	SRR15221018	SRR15243651
SRR15182594	SRR15182664	SRR15056644	SRR15056836	SRR15244291	SRR15245257	SRR15221040	SRR15243652
SRR15182595	SRR15182665	SRR15056656	SRR15056837	SRR15244299	SRR15245279	SRR15221051	SRR15243654
SRR15182596	SRR15182666	SRR15056673	SRR15056839	SRR15244301	SRR15245287	SRR15221095	SRR15243657
SRR15182597	SRR15182667	SRR15056674	SRR15056841	SRR15244302	SRR15245289	SRR15221104	SRR15243658
SRR15182598	SRR15182668	SRR15056675	SRR15056843	SRR15244303	SRR15245290	SRR15221105	SRR15243671
SRR15182599	SRR15182669	SRR15056676	SRR15056844	SRR15244312	SRR15245291	SRR15221107	SRR15243673
SRR15182600	SRR15182670	SRR15056683	SRR15056845	SRR15244313	SRR15245300	SRR15221108	SRR15243674
SRR15182601	SRR15182671	SRR15056684	SRR15056848	SRR15244314	SRR15245301	SRR15221110	SRR15243677
SRR15182602	SRR15182672	SRR15056685	SRR15056849	SRR15244315	SRR15245302	SRR15221114	SRR15243678
SRR15182603	SRR15182673	SRR15056687	SRR15056853	SRR15244316	SRR15245303	SRR15221118	SRR15243683
SRR15182604	SRR15182674	SRR15056689	SRR15056854	SRR15244319	SRR15245304
SRR15182605	SRR15182675	SRR15056691	SRR15056855	SRR15244323	SRR15245307
SRR15182606	SRR15182676	SRR15056692	SRR15056858	SRR15244324	SRR15245311
SRR15182607	SRR15182677	SRR15056693	SRR15056859	SRR15244325	SRR15245312
SRR15182608	SRR15182678	SRR15056696	SRR15056861	SRR15244326	SRR15245313
SRR15182609	SRR15182679	SRR15056697	SRR15056862	SRR15244331	SRR15245314
SRR15182610	SRR15182680	SRR15056701	SRR15056863	SRR15244332	SRR15245319
SRR15182611	SRR15182681	SRR15056702	SRR15056864	SRR15244334	SRR15245320
SRR15182612	SRR15182682	SRR15056703	SRR15056865	SRR15244335	SRR15245322
SRR15182613	SRR15182683	SRR15056706	SRR15056866	SRR15244357	SRR15245323
SRR15182614	SRR15182684	SRR15056707	SRR15056868	SRR15244358	SRR15245345
SRR15182615	SRR15182685	SRR15056709	SRR15056871
SRR15182616	SRR15182686	SRR15056710	SRR15056906
SRR15182617	SRR15182687	SRR15056711	SRR15056928
SRR15182618	SRR15182688	SRR15056712	SRR15056939
SRR15182619	SRR15182689	SRR15056713	SRR15056950
SRR15182620	SRR15182690	SRR15056714	SRR15056972
SRR15182621	SRR15182691	SRR15056716	SRR15056989
SRR15182622	SRR15182692	SRR15056719	SRR15056990
SRR15182623	SRR15182693	SRR15056755	SRR15056991
SRR15182624	SRR15182694	SRR15056766	SRR15056992
SRR15182625	SRR15182695
SRR15182626	SRR15182696
SRR15182627	SRR15182697
SRR15182628	SRR15182698
SRR15182629	SRR15182699
SRR15182630	SRR15182700
SRR15182631	SRR15182701
