# Supplementary material for: Fecal Microbiota and Gut Microbe-Derived Extracellular Vesicles in Colorectal Cancer
Source: Frontiers journal article supplement (doi:10.3389/fonc.2021.650026), 2021-09-14
Supplement: Table_2.DOCX [file Table_2.DOCX]

| **Table 1**. Taxa showing a significant different abundance between CRC with control in the gut microbiota. | | | | |
| --- | --- | --- | --- | --- |
| Taxon | t-statistic | Unadjusted *p* value | Adjusted *p* value | Reference |
| Phylum Firmicutes |  |  |  |  |
| Family *Clostridiaceae 1* | -4.17 | <0.001 | **0.002** | (1) |
| Genus *Clostridium sensu stricto 1* | -4.17 | <0.001 | **0.004** |  |
| Family *Family XIII* | -3.73 | <0.001 | **0.004** | (2) |
| Genus *Family XIII AD 3011 group* | -3.73 | <0.001 | **0.008** |  |
| Family *Erysipelotrichaceae* | -3.50 | <0.001 | **0.016** | (1) |
| Genus *Erysipelotrichaceae UCG-003* | -3.50 | 0.001 | **0.042** |  |
| Genus *Turicibacter* | -2.89 | 0.004 | 0.129 | (1) |
| Family *Ruminococcaceae* |  |  |  | (1, 3) |
| Genus *Ruminococcus 1* | -5.81 | <0.001 | **0.004** | (4, 5) |
| Genus *Ruminococcaceae UCG-013* | -3.78 | <0.001 | **0.004** |  |
| Genus *Butyricicoccus* | -2.68 | 0.009 | 0.224 | (6) |
| Genus *Subdoligranulum* | -2.59 | 0.012 | 0.286 |  |
| Family *Lachnospiraceae* |  |  |  | (1, 4) |
| Genus *Blautia* | -4.27 | <0.001 | **0.009** | (5) |
| Genus *[Eubacterium] hallii group* | -3.82 | <0.001 | **0.003** | (7) |
| Genus *Lachnospiraceae NC2004 group* | -3.45 | <0.001 | **0.003** |  |
| Genus *[Eubacterium] ventriosum* | -3.08 | 0.004 | 0.117 | (7) |
| Genus *[Ruminococcus] torques group* | -2.15 | 0.037 | 0.553 |  |
| Family *Peptostreptococcaceae* | -2.80 | 0.008 | 0.128 | (1, 3) |
| Genus *Romboutsia* | -3.15 | 0.002 | 0.071 |  |
| Genus *Terrisporobacter* | -2.43 | 0.020 | 0.393 |  |
| Family *Christensenellaceae* | -2.76 | 0.007 | 0.124 | (1) |
| Genus *Christensenellaceae R-7 group* | -2.76 | 0.007 | 0.207 |  |
| Family *Leuconostocaceae* | -2.77 | 0.008 | 0.124 | (8) |
| Genus *Weissella* | -2.77 | 0.008 | 0.209 |  |
| Family *Lactobacillaceae* | -2.37 | 0.022 | 0.234 | (1) |
| Genus *Lactobacillus* | -2.37 | 0.022 | 0.405 |  |
| Phylum Bacteriodetes | 6.55 | <0.001 | **<0.001** |  |
| Family *Bacteroidaceae* | 5.26 | <0.001 | **0.002** |  |
| Genus *Bacteroides* | 5.26 | <0.001 | **0.004** | (4, 9) |
| Family *Marinifilaceae* | 2.69 | 0.009 | 0.128 |  |
| Genus *Odoribacter* | 2.69 | 0.009 | 0.227 | (1, 3, 4, 9) |
| Family *Rikenellaceae* | 2.47 | 0.015 | 0.185 | (1) |
| Genus *Alistipes* | 2.47 | 0.015 | 0.325 | (3, 4) |
| Family *Tannerellaceae* | 2.03 | 0.046 | 0.390 |  |
| Genus *Parabacteroides* | 2.03 | 0.046 | 0.613 | (4) |
| Phylum Actinobacteria | -5.82 | <0.001 | **<0.001** |  |
| Family *Bifidobacteriaceae* | -5.93 | <0.001 | **0.002** | (1) |
| Genus *Bifidobacterium* | -5.93 | <0.001 | **0.004** | (4, 5) |
| Family *Eggerthellaceae* | -2.52 | 0.014 | 0.185 |  |
| Genus *Eggerthella* | -2.52 | 0.014 | 0.321 | (3) |
| Family *Actinomycetaceae* | -2.36 | 0.021 | 0.234 |  |
| Genus *Actinomyces* | -2.36 | 0.021 | 0.405 | (1) |
| The change of column (log2 fold) represents the multiplicative change in taxa abundance from CRC to control. | | | | |
| Negative numbers represent a trend of decreasing abundance in CRC group compared with control group. | | | | |

**References**

1. Hibberd AA, Lyra A, Ouwehand AC, Rolny P, Lindegren H, Cedgard L, et al. Intestinal microbiota is altered in patients with colon cancer and modified by probiotic intervention. BMJ Open Gastroenterol. 2017;4(1):e000145. Epub 2017/09/26. doi: 10.1136/bmjgast-2017-000145. PubMed PMID: 28944067; PubMed Central PMCID: PMCPMC5609083.

2. Rajilic-Stojanovic M, de Vos WM. The first 1000 cultured species of the human gastrointestinal microbiota. FEMS Microbiol Rev. 2014;38(5):996-1047. Epub 2014/05/28. doi: 10.1111/1574-6976.12075. PubMed PMID: 24861948; PubMed Central PMCID: PMCPMC4262072.

3. Sheng Q, Du H, Cheng X, Cheng X, Tang Y, Pan L, et al. Characteristics of fecal gut microbiota in patients with colorectal cancer at different stages and different sites. Oncol Lett. 2019;18(5):4834-44. Epub 2019/10/16. doi: 10.3892/ol.2019.10841. PubMed PMID: 31611994; PubMed Central PMCID: PMCPMC6781660.

4. Feng Q, Liang S, Jia H, Stadlmayr A, Tang L, Lan Z, et al. Gut microbiome development along the colorectal adenoma-carcinoma sequence. Nat Commun. 2015;6:6528. Epub 2015/03/12. doi: 10.1038/ncomms7528. PubMed PMID: 25758642.

5. Liu X, Mao B, Gu J, Wu J, Cui S, Wang G, et al. Blautia-a new functional genus with potential probiotic properties? Gut Microbes. 2021;13(1):1-21. Epub 2021/02/03. doi: 10.1080/19490976.2021.1875796. PubMed PMID: 33525961; PubMed Central PMCID: PMCPMC7872077.

6. Chang SC, Shen MH, Liu CY, Pu CM, Hu JM, Huang CJ. A gut butyrate-producing bacterium Butyricicoccus pullicaecorum regulates short-chain fatty acid transporter and receptor to reduce the progression of 1,2-dimethylhydrazine-associated colorectal cancer. Oncol Lett. 2020;20(6):327. Epub 2020/10/27. doi: 10.3892/ol.2020.12190. PubMed PMID: 33101496; PubMed Central PMCID: PMCPMC7577080.

7. Ai D, Pan H, Li X, Gao Y, Liu G, Xia LC. Identifying Gut Microbiota Associated With Colorectal Cancer Using a Zero-Inflated Lognormal Model. Front Microbiol. 2019;10:826. Epub 2019/05/10. doi: 10.3389/fmicb.2019.00826. PubMed PMID: 31068913; PubMed Central PMCID: PMCPMC6491826.

8. Jacqueline C, Brazier L, Faugere D, Renaud F, Thomas F, Roche B. Can intestinal microbiota be associated with non-intestinal cancers? Sci Rep. 2017;7(1):12722. Epub 2017/10/07. doi: 10.1038/s41598-017-11644-9. PubMed PMID: 28983086; PubMed Central PMCID: PMCPMC5629204.

9. Yamamoto M, Matsumoto S. Gut microbiota and colorectal cancer. Genes Environ. 2016;38:11. Epub 2016/06/29. doi: 10.1186/s41021-016-0038-8. PubMed PMID: 27350830; PubMed Central PMCID: PMCPMC4917993.

| **Table 2.** Taxa showing a significant different abundance between CRC with control in the gut microbe-derived extracellular vesicles. | | | |
| --- | --- | --- | --- |
| Taxon | t-statistic | Unadjusted *p* value | Adjusted *p* value |
| Phylum Firmicutes | 3.16 | 0.002 | **0.008** |
| Family *Clostridiaceae 1* | -3.36 | 0.001 | **0.019** |
| Genus *Clostridium sensu stricto 1* | -3.36 | 0.001 | **0.003** |
| Family *Erysipelotrichaceae* | 3.28 | 0.001 | **0.019** |
| Genus *Catenibacterium* | 7.51 | <0.001 | **0.004** |
| Genus *Erysipelotrichaceae UCG-003* | 4.41 | <0.001 | **0.004** |
| Genus *Turicibacter* | -2.00 | 0.043 | 0.541 |
| Family *Ruminococcaceae* | 4.22 | <0.001 | **0.002** |
| Genus *Faecalibacterium* | 3.41 | <0.001 | **0.020** |
| Genus *Ruminococcus 1* | 2.96 | 0.004 | 0.089 |
| Genus *Ruminococcus 2* | 2.23 | 0.028 | **0.028** |
| Family *Lachnospiraceae* |  |  |  |
| Genus *Blautia* | 3.78 | <0.001 | **0.012** |
| Genus *[Eubacterium] hallii group* | 5.04 | <0.001 | **0.004** |
| Genus *[Ruminococcus] torques group* | 4.85 | <0.001 | **0.004** |
| Genus *Oribacterium* | 3.79 | <0.001 | **0.012** |
| Genus *Dorea* | 3.91 | 0.004 | **0.018** |
| Genus *Lachnospiraceae UCG-008* | 2.52 | 0.012 | 0.230 |
| Family *Peptostreptococcaceae* | -3.25 | 0.003 | **0.033** |
| Genus *Romboutsia* | -4.35 | <0.001 | **0.001** |
| Genus *Terrisporobacter* | -3.56 | <0.001 | **0.003** |
| Genus *Intestinibacter* | -3.07 | 0.004 | 0.092 |
| Family *Veillonellaceae* | -6.10 | <0.001 | **0.002** |
| Genus *Dialister* | -6.10 | <0.001 | **0.004** |
| Family *Staphylococcaceae* | -4.61 | <0.001 | **0.002** |
| Genus *Staphylococcus* | -4.61 | <0.001 | **0.004** |
| Family *Acidaminococcaceae* | -3.28 | 0.001 | **0.018** |
| Phylum Proteobacteria |  |  |  |
| Family *Moraxellaceae* |  |  |  |
| Genus *Enhydrobacter* | -2.15 | 0.034 | 0.476 |
| Phylum Actinobacteria |  |  |  |
| Family *Coriobacteriaceae* | 4.78 | <0.001 | **0.004** |
| Genus *Collinsella* | 4.78 | <0.001 | **0.007** |
| Phylum Verrucomicrobia | -3.77 | <0.001 | **0.002** |
| Family *Akkermansiaceae* | -3.77 | <0.001 | **0.004** |
| Genus *Akkermansia* | -3.77 | <0.001 | **0.012** |
| The change of column (log2 fold) represents the multiplicative change in taxa abundance from CRC to control. | | | |
| Negative numbers represent a trend of decreasing abundance in CRC group compared with control group. | | | |
